# Supplementary material for: Variation in Actionable Pharmacogenetic Markers in Natives and Mestizos From Mexico
Source: PubMed Central journal article supplement (PMC6796793; doi:10.3389/fphar.2019.01169), 2019-10-10
Supplement: Table_1.pdf [file Table_1.pdf]

Supplemental T1. Novel variation in 17 PGKB genes

| Gene         | POS               | Change     | functional impact | Valid      | MAF %       |
|--------------|-------------------|------------|-------------------|------------|-------------|
| APOE         | 19:45412411       | G/C        | synonymous        | 0/3        | 10.6        |
| ACE          | 17:61573984       | C/T        | coding            | 0/3        | 2.5         |
| ACE          | 17:61575123       | C/T        | regulatory        | 0/3        | 1.06        |
| ACE          | 17:61585438       | A/G        | coding            | 0/3        | 1.15        |
| ACE          | 17:61585440       | C/G        | coding            | 0/3        | 1.16        |
| ACE          | 17:61585444       | G/C        | coding            | 0/3        | 1.19        |
| ACE          | 17:61587556       | GA/AA      | coding            | 0/3        | 5           |
| ACE          | 17:61597227       | T/C        | transcript        | 1/3        | 1.06        |
| ACE          | 17:61597264       | G/T        | transcript        | 0/3        | 2.92        |
| ABCB1        | 7:87133076        | G/C        | downstream        | 0/3        | 1.09        |
| ABCB1        | 7:87138330        | C/T        | transcript        | 0/3        | 2.5         |
| <b>ABCB1</b> | <b>7:87165002</b> | <b>C/A</b> | <b>transcript</b> | <b>2/3</b> | <b>1.85</b> |
| ABCB1        | 7:87180070        | C/A        | missense          | 1/3        | 1.67        |
| ABCB1        | 7:87196213        | C/A        | missense          | 1/3        | 1.82        |
| ABCB1        | 7:87144590        | A/G        | missense          | 1/3        | 1.06        |
| <b>ABCB1</b> | <b>7:87160718</b> | <b>C/A</b> | <b>synonymous</b> | <b>2/3</b> | <b>1.6</b>  |
| ABCB1        | 7:87160733        | A/G        | synonymous        | 1/3        | 1.6         |
| ABCB1        | 7:87160742        | G/T        | missense          | 1/3        | 1.6         |
| ABCB1        | 7:87160744        | A/G        | missense          | 1/3        | 1.6         |
| ABCB1        | 7:87160751        | A/G        | synonymous        | 1/3        | 1.6         |
| ABCB1        | 7:87160754        | T/G        | synonymous        | 0/3        | 1.6         |
| ABCB1        | 7:87160785        | G/A        | missense          | 1/3        | 1.06        |
| <b>ABCB1</b> | <b>7:87160786</b> | <b>T/A</b> | <b>missense</b>   | <b>2/3</b> | <b>1.06</b> |
| ABCB1        | 7:87175224        | T/C        | synonymous        | 0/3        | 1.06        |
| ABCB1        | 7:87175258        | T/C        | missense          | 0/3        | 1.06        |
| ABCB1        | 7:87175302        | A/G        | synonymous        | 1/3        | 1.06        |
| ABCB1        | 7:87175329        | A/G        | synonymous        | 1/3        | 1.06        |
| ABCB1        | 7:87175334        | T/C        | missense          | 1/3        | 1.06        |
| ABCB1        | 7:87175338        | G/A        | splice            | 1/3        | 1.06        |
| ABCB1        | 7:87179245        | A/T        | synonymous        | 1/3        | 1.06        |
| ABCB1        | 7:87179263        | T/C        | synonymous        | 1/3        | 1.06        |
| ABCB1        | 7:87179269        | T/G        | synonymous        | 1/3        | 1.06        |
| <b>ABCB1</b> | <b>7:87179286</b> | <b>A/G</b> | <b>synonymous</b> | <b>2/3</b> | <b>1.06</b> |
| ABCB1        | 7:87179287        | T/C        | synonymous        | 1/3        | 1.06        |
| ABCB1        | 7:87196186        | T/C        | missense          | 1/3        | 1.06        |
| ABCB1        | 7:87196190        | A/G        | synonymous        | 1/3        | 1.06        |
| ABCB1        | 7:87196193        | T/C        | synonymous        | 1/3        | 1.06        |
| ABCB1        | 7:87196202        | T/C        | synonymous        | 1/3        | 1.06        |
| ABCB1        | 7:87196238        | A/G        | synonymous        | 1/3        | 1.06        |
| CBR3         | 21:37507219       | C/A        | UTR               | 0/3        | 1           |
| COMT         | 22:19949754       | A/T        | intron            | 1/3        | 2.86        |

|                |                    |            |                 |            |              |
|----------------|--------------------|------------|-----------------|------------|--------------|
| COMT           | 22:19954930        | C/A        | intron          | 0/3        | 1.89         |
| COMT           | 22:19958910        | C/A        | downstream      | 0/3        | 1.28         |
| COMT           | 22:19958912        | C/A        | downstream      | 0/3        | 1.89         |
| CYP2B6         | 19:41497360        | C/A        | synonymous      | 0/3        | 1.69         |
| CYP2C19        | 10:96454505        | T/G        | intron          | 0/3        | 2.7          |
| CYP2C19        | 10:96479897        | A/C        | intron          | 0/3        | 1.12         |
| CYP2C19        | 10:96479899        | T/C        | intron          | 0/3        | 1.15         |
| CYP2C19        | 10:96522442        | T/A        | UTR             | 0/3        | 1.67         |
| CYP2C19        | 10:96522531        | C/A        | <b>missense</b> | 0/3        | 2.94         |
| CYP2C19        | 10:96522710        | A/C        | intron          | 0/3        | 1.06         |
| CYP2C19        | 10:96535790        | C/A        | intron          | 0/3        | 1.54         |
| CYP2C19        | 10:96540083        | T/G        | intron          | 0/3        | 1.49         |
| <b>CYP2C19</b> | <b>10:96609809</b> | <b>T/A</b> | <b>missense</b> | <b>2/3</b> | <b>1.15</b>  |
| CYP2C19        | 10:96612219        | T/C        | intron          | 0/3        | 1.82         |
| CYP2C19        | 10:96612984        | C/A        | UTR             | 0/3        | 2.06         |
| CYP2C9         | 10:96702594        | C/A        | intron          | 0/3        | 3.01         |
| CYP2C9         | 10:96703117        | A/G        | intron          | 0/3        | 1.06         |
| CYP2C9         | 10:96705222        | G/A        | intron          | 0/3        | 1.06         |
| CYP2C9         | 10:96748329        | T/C        | intron          | 0/3        | 2.88         |
| CYP2C9         | 10:96749251        | G/C        | downstream      | 0/3        | 1.09         |
| CYP2D6         | 22:42522759        | G/C        | splice          | 0/3        | 1.72         |
| CYP2D6         | 22:42524143        | A/C        | intron          | 0/3        | 1.36         |
| CYP2D6         | 22:42526061        | T/G        | intron          | 0/3        | <b>40.91</b> |
| CYP3A4         | 7:99355212         | G/A        | downstream      | 0/3        | 1.39         |
| CYP3A4         | 7:99365768         | G/C        | intron          | 0/3        | 3.28         |
| CYP3A4         | 7:99365770         | G/A        | intron          | 0/3        | 3.28         |
| CYP3A4         | 7:99366179         | C/A        | intron          | 0/3        | 1.47         |
| <b>CYP3A4</b>  | <b>7:99377662</b>  | <b>C/A</b> | <b>missense</b> | <b>2/3</b> | <b>1.47</b>  |
| CYP3A4         | 7:99381031         | A/G        | intron          | 0/3        | 2.5          |
| CYP3A5         | 7:99245888         | C/A        | UTR             | 0/3        | 1.76         |
| CYP3A5         | 7:99245891         | C/A        | UTR             | 0/3        | 1.86         |
| CYP3A5         | 7:99248025         | A/G        | intron          | 0/3        | 1.06         |
| CYP3A5         | 7:99257879         | A/T        | intron          | 0/3        | 2.13         |
| CYP3A5         | 7:99260925         | C/A        | intron          | 0/3        | 3.82         |
| CYP3A5         | 7:99263091         | G/A        | intron          | 0/3        | 2.38         |
| CYP3A5         | 7:99264910         | T/C        | intron          | 0/3        | 3.51         |
| CYP3A5         | 7:99264917         | C/A        | intron          | 0/3        | 3.51         |
| CYP3A5         | 7:99277442         | T/C        | splice          | 1/3        | 1.95         |
| DPD            | 1:97602855         | G/T        | intron          | 1/3        | 1.06         |
| DPD            | 1:97915621         | T/C        | synonymous      | 1/3        | 1.06         |
| DPD            | 1:97915642         | A/G        | synonymous      | 1/3        | 1.6          |
| DPD            | 1:97915651         | T/G        | missense        | 1/3        | 1.6          |
| DPD            | 1:98015187         | A/T        | missense        | 0/3        | 1.06         |
| DPD            | 1:98015191         | A/C        | synonymous      | 1/3        | 1.06         |
| DPD            | 1:98015212         | T/C        | synonymous      | 1/3        | 1.06         |
| DPD            | 1:98015220         | C/G        | missense        | 1/3        | 1.06         |
| DPD            | 1:98015227         | A/G        | synonymous      | 1/3        | 1.06         |
| DPD            | 1:98015236         | A/G        | synonymous      | 1/3        | 1.06         |
| DPD            | 1:98058901         | A/G        | missense        | 0/3        | 1.06         |
| DPD            | 1:98058908         | G/T        | synonymous      | 1/3        | 1.6          |

|        |             |     |            |     |      |
|--------|-------------|-----|------------|-----|------|
| DPD    | 1:98059027  | G/C | intron     | 1/3 | 1.06 |
| DPD    | 1:98059057  | A/G | intron     | 1/3 | 1.06 |
| DPD    | 1:98186061  | C/T | UTR        | 1/3 | 1.69 |
| DPD    | 1:98186277  | C/T | UTR        | 1/3 | 1.06 |
| DPD    | 1:98348549  | T/C | intron     | 0/3 | 1.67 |
| DPD    | 1:98348873  | C/A | missense   | 1/3 | 1.67 |
| DPD    | 1:98386502  | T/A | UTR        | 0/3 | 3.06 |
| NAT1/2 | 8:18070030  | A/G | intron     | 0/3 | 1.06 |
| NAT1/2 | 8:18070394  | A/G | intron     | 1/3 | 1.06 |
| NAT1/2 | 8:18081208  | T/C | downstream | 0/3 | 1.67 |
| NAT1/2 | 8:18248089  | T/C | downstream | 0/3 | 1.67 |
| TPMT   | 6:18139708  | A/T | intron     | 0/3 | 1.64 |
| TPMT   | 6:18139709  | A/G | intron     | 0/3 | 1.61 |
| TPMT   | 6:18143966  | A/G | splice     | 0/3 | 8.33 |
| TPMT   | 6:18143968  | A/G | intron     | 0/3 | 8.33 |
| TPMT   | 6:18143970  | T/C | intron     | 0/3 | 8.33 |
| TPMT   | 6:18143973  | T/C | intron     | 0/3 | 8.33 |
| TPMT   | 6:18148356  | T/C | intron     | 0/3 | 1.06 |
| TPMT   | 6:18155178  | T/A | downstream | 0/3 | 1.06 |
| UGT1A1 | 2:234544998 | G/T | downstream | 0/3 | 1.6  |
| UGT1A1 | 2:234638262 | T/A | missense   | 1/3 | 1.06 |
| UGT1A1 | 2:234669746 | T/C | synonymous | 1/3 | 1.06 |
| VKORC1 | 16:31099858 | C/A | intron     | 0/3 | 2.66 |
| VKORC1 | 16:31105136 | T/G | downstream | 0/3 | 1.06 |
| VKORC1 | 16:31110460 | G/T | downstream | 1/3 | 1.06 |
