# Supplementary material for: Variation in Actionable Pharmacogenetic Markers in Natives and Mestizos From Mexico
Source: PubMed Central journal article supplement (PMC6796793; doi:10.3389/fphar.2019.01169), 2019-10-10
Supplement: Table_2.pdf [file Table_2.pdf]

## ST2. Novel variation in PGKB genes in Natives and Mestizos

<sup>1</sup>No variants with MAF>1% were observed on *SLCO1B1*

| Gene           | Natives mean, MAF%                              | Mestizos mean, MAF%                          | Observations for novel variants                                                                                                                                                                                                                                       |
|----------------|-------------------------------------------------|----------------------------------------------|-----------------------------------------------------------------------------------------------------------------------------------------------------------------------------------------------------------------------------------------------------------------------|
| <b>ABCB1</b>   | 25 (1-1.6%), 8 missense,                        | 5 (1-2.5%), 2 intron,                        | Natives: 20 variant's functional impact validated in more than one algorithm, 3 missensevariant's functional impact validated in more than 2 algorithms. Mestizos: one variant's functional impact validated in more than one algorithm and in at least 2 algorithms. |
|                | 16 syn, 1 spliceregion                          | 2 missense, 1 downstream                     | 10 deleterious                                                                                                                                                                                                                                                        |
| <b>ACE</b>     | 2 (1%), downstream                              | 6 (1-3%), 5 intron, 1 downstream             | In Natives one variant's functional impact validated in more than one algorithm<br>8 deleterious                                                                                                                                                                      |
| <b>APOE</b>    | 1 (1%), syn                                     | 0                                            | None deleterious                                                                                                                                                                                                                                                      |
| <b>CBR3</b>    | 1 (1%) UTR                                      | 1 (0.5%), UTR                                | Variant observed in both populations<br>None deleterious                                                                                                                                                                                                              |
| <b>COMT</b>    | 0                                               | 4 (1-3%), 2 intron, 2 downstream             | One variant's functional impact validated in more than one algorithm, 2 deleterious                                                                                                                                                                                   |
| <b>CYP2B6</b>  | 0                                               | 1 (1.7%), syn                                | None deleterious                                                                                                                                                                                                                                                      |
| <b>CYP2C19</b> | 1 (1.1%), intron                                | 10 (1-3%), 6 intron, 2 UTR, 2 missense       | Variant's 10:96609809 functional impact validated in more than one algorithm, 2 deleterious                                                                                                                                                                           |
| <b>CYP2C9</b>  | 2 (1.1%), intron                                | 3 (1-3%), 2 intron, 1 downstream             | None deleterious                                                                                                                                                                                                                                                      |
| <b>CYP2D6</b>  | 0                                               | 3 (1-40%), 2 intron, 1 spliceregion          | 2 deleterious                                                                                                                                                                                                                                                         |
| <b>CYP3A4</b>  | 0                                               | 6 (1-3%), 4 intron, 1 missense, 1 downstream | Variant's 7:99377662 functional impact was validated in more than one algorithm in Mestizos, 1 deleterious                                                                                                                                                            |
| <b>CYP3A5</b>  | 2 (1-2%), intron                                | 7(1-4%), 4 intron, 2UTR, 1 spliceregion      | Variant's 7:99277442 functional impact was validated in more than one algorithm in Mestizos, 1 deleterious                                                                                                                                                            |
| <b>DPD</b>     | 15 (1-1.6%), 3 intron, 4 missense, 7 syn, 1 UTR | 4 (1-3%), 1 intron, 2 UTR, 1 missense        | 13 variant's functional impact were validated in more than one algorithm in Natives and 2 variant's in Mestizos, 5 deleterious                                                                                                                                        |
| <b>NAT2</b>    | 2 (1%), intron                                  | 2 (1-2%), 2 downstream                       | Variant's 8:180070394 functional impact was validated in more than one algorithm in Native<br>None deleterious                                                                                                                                                        |
| <b>TPMT</b>    | 2 (1%), 1 intron, 1 downstream                  | 6 (1-8%), 5 intron, 1 spliceregion           | None deleterious                                                                                                                                                                                                                                                      |
| <b>UGT1A1</b>  | 3 (1-1.6%), 2 intron, 1 downstream              | 0                                            | 2 variant's functional impact were validated in more than one algorithm in Natives<br>2 deleterious                                                                                                                                                                   |
| <b>VKORC1</b>  | 3 (1-3%), 1 intron, 2 downstream                | 0                                            | Variant's 16:3111046 functional impact was validated in more than one algorithm in Natives<br>2 deleterious                                                                                                                                                           |
